# Supplementary material for: Rapidly scalable and low-cost public health surveillance reporting system for COVID-19
Source: HighWire-hosted journal article supplement (doi:10.1136/bmjhci-2023-100759), 2024-01-01
Supplement: bmjhci-2023-100759supp001_data_supplement.pdf [file bmjhci-2023-100759supp001_data_supplement.pdf]

**Supplementary Appendix 1**

The 7-day incidence and mortality rate, test positivity ratio and testing rate, hospital occupancy rate, ICU occupancy rate, ventilator occupancy rate, percentage of population vaccinated, and the ratio of variants to total cases are given in Supplementary table 1.

Supplementary table 1: Epidemiological indicators of transmission

| Indicator                            | Function                                                                                                                                        | Base unit              |
|--------------------------------------|-------------------------------------------------------------------------------------------------------------------------------------------------|------------------------|
| 7-day incidence rate                 | $\frac{\text{No. of reported cases (in time period)}}{\text{Mid - year population}} \times 100,000$                                             | Per 100,000 population |
| 7-day mortality rate                 | $\frac{\text{No. of reported mortalities (in time period)}}{\text{Mid - year population}} \times 100,000$                                       | Per 100,000 population |
| Test positivity ratio                | $\frac{14 - \text{day lagged reported cases (per day)}}{\text{No. of individuals tested (per day)}}$                                            | Percentage             |
| Testing rate                         | $\frac{\text{No. of individuals tested (per day)}}{\text{Mid - year population}} \times 1,000$                                                  | Per 1,000 population   |
| Hospitalisation bed utilisation rate | $\frac{\text{No. of admitted patients}}{\text{No. of hospital beds available}} \times 100$                                                      | Percentage             |
| ICU bed utilisation rate             | $\frac{\text{No. of patients admitted in ICU}}{\text{No. of ICU beds available}} \times 100$                                                    | Percentage             |
| Ventilator utilisation rate          | $\frac{\text{No. of patients utilising ventilators}}{\text{No. of ventilators available}} \times 100$                                           | Percentage             |
| Percentage population vaccinated     | $\frac{\text{No. of individuals vaccinated (1st or 2nd dose cumulative up to date)}}{\text{Mid - year population (Adult or Total)}} \times 100$ | Percentage             |
| Ratio of variants to cases           | $\frac{\text{Cumulative no. of variants detected (by strain in time period)}}{\text{No. of reported cases (in time period)}}$                   | Ratio                  |

The Cori et al. approach was used to estimate the time-varying (instantaneous) reproduction number ( $R_t$ ) on 7-day sliding intervals, with 95% credible intervals. This approach used a time-series of daily case data by reporting date and a serial interval distribution assumed to follow a discretised gamma distribution. It then models the number of secondary infections at each time step relative to the number of primary infections and a period of infectiousness represented by the serial interval. The time-varying reproduction number is defined as the fraction of the expected number of secondary infections at time  $t$  over the number of infected individuals weighted by their relative infectiousness at time  $t$ , given by the generation or serial interval distribution.<sup>44</sup> Serial intervals from a review of published and unpublished literature were assumed to fit the Malaysian profile of cases.<sup>45-51</sup> An  $R_t$  of more than 1 suggests that the epidemic will continue to grow, whilst an  $R_t$  of less than 1 suggest transmission is in decay. The  $R_t$  is given by:

$$R_t = \frac{I_t}{\sum_{s=1}^t I_{t-s} w_s}$$

Where  $I_t$  is the number of infections on day  $t$ , and  $w_s$  is the generation interval of  $s$  days separate an infector-infectee pair.
