# Supplementary material for: Rapidly scalable and low-cost public health surveillance reporting system for COVID-19
Source: HighWire-hosted journal article supplement (doi:10.1136/bmjhci-2023-100759), 2024-01-01
Supplement: bmjhci-2023-100759supp002_data_supplement.pdf [file bmjhci-2023-100759supp002_data_supplement.pdf]

**Supplementary Appendix 2**

Supplementary table 2 Characteristics of dashboard views

|                              | Overall,<br>N = 919 <sup>1</sup> | Period                                |                                       |                                       |                                       |                                       |                                      |                                      |
|------------------------------|----------------------------------|---------------------------------------|---------------------------------------|---------------------------------------|---------------------------------------|---------------------------------------|--------------------------------------|--------------------------------------|
|                              |                                  | Oct-Dec 2020,<br>N = 105 <sup>1</sup> | Jan-Mar 2021,<br>N = 193 <sup>1</sup> | Apr-Jun 2021,<br>N = 209 <sup>1</sup> | Jul-Sep 2021,<br>N = 164 <sup>1</sup> | Oct-Dec 2021,<br>N = 101 <sup>1</sup> | Jan-Mar 2022,<br>N = 91 <sup>1</sup> | Apr-Jun 2022,<br>N = 56 <sup>1</sup> |
| <b>Countries<sup>3</sup></b> |                                  |                                       |                                       |                                       |                                       |                                       |                                      |                                      |
| Malaysia                     | 871 (96%)                        | 100 (95%)                             | 176 (93%)                             | 199 (96%)                             | 157 (96%)                             | 93 (93%)                              | 90 (99%)                             | 56 (100%)                            |
| Others*                      | 41 (4.5%)                        | 5 (4.8%)                              | 13 (6.9%)                             | 9 (4.3%)                              | 6 (3.7%)                              | 7 (7.0%)                              | 1 (1.1%)                             | 0 (0%)                               |
| <b>Source</b>                |                                  |                                       |                                       |                                       |                                       |                                       |                                      |                                      |
| Department website           | 1 (0.1%)                         | 1 (1.0%)                              | 0 (0%)                                | 0 (0%)                                | 0 (0%)                                | 0 (0%)                                | 0 (0%)                               | 0 (0%)                               |
| Direct <sup>^</sup>          | 608 (66%)                        | 62 (59%)                              | 101 (52%)                             | 111 (53%)                             | 105 (64%)                             | 90 (89%)                              | 85 (93%)                             | 54 (96%)                             |
| GitHub                       | 310 (34%)                        | 42 (40%)                              | 92 (48%)                              | 98 (47%)                              | 59 (36%)                              | 11 (11%)                              | 6 (6.6%)                             | 2 (3.6%)                             |
| <b>Language</b>              |                                  |                                       |                                       |                                       |                                       |                                       |                                      |                                      |
| English                      | 911 (99%)                        | 105 (100%)                            | 192 (99%)                             | 206 (99%)                             | 162 (99%)                             | 100 (99%)                             | 90 (99%)                             | 56 (100%)                            |
| Non-English*                 | 8 (0.9%)                         | 0 (0%)                                | 1 (0.5%)                              | 3 (1.4%)                              | 2 (1.2%)                              | 1 (1.0%)                              | 1 (1.1%)                             | 0 (0%)                               |
| <b>Device</b>                |                                  |                                       |                                       |                                       |                                       |                                       |                                      |                                      |
| Desktop                      | 763 (83%)                        | 74 (70%)                              | 144 (75%)                             | 168 (80%)                             | 131 (80%)                             | 100 (99%)                             | 91 (100%)                            | 55 (98%)                             |
| Mobile                       | 154 (17%)                        | 31 (30%)                              | 49 (25%)                              | 41 (20%)                              | 31 (19%)                              | 1 (1.0%)                              | 0 (0%)                               | 1 (1.8%)                             |
| Tablet                       | 2 (0.2%)                         | 0 (0%)                                | 0 (0%)                                | 0 (0%)                                | 2 (1.2%)                              | 0 (0%)                                | 0 (0%)                               | 0 (0%)                               |
| <b>Browser</b>               |                                  |                                       |                                       |                                       |                                       |                                       |                                      |                                      |
| Chrome                       | 697 (76%)                        | 73 (70%)                              | 126 (65%)                             | 147 (70%)                             | 118 (72%)                             | 91 (90%)                              | 86 (95%)                             | 56 (100%)                            |
| Others*                      | 192 (21%)                        | 25 (24%)                              | 66 (34%)                              | 51 (24%)                              | 41 (25%)                              | 4 (4.0%)                              | 5 (5.5%)                             | 0 (0%)                               |
| Safari                       | 30 (3.3%)                        | 7 (6.7%)                              | 1 (0.5%)                              | 11 (5.3%)                             | 5 (3.0%)                              | 6 (5.9%)                              | 0 (0%)                               | 0 (0%)                               |

<sup>1</sup>n (%)<sup>2</sup>Pearson's Chi-squared test; Fisher's exact test<sup>3</sup> Seven NA values in locations

\*Other countries include Australia (3), Brunei (1), Egypt (1), Germany (1), Indonesia (2), Ireland (1), Japan (1), New Zealand (2), Norway (1), Pakistan (1), Singapore (1), South Korea (1), Sri Lanka (3), Ukraine (1), United States (4). Other languages include Chinese and Korean. Other browsers include Android Webview (14), Edge (3), Opera (2), and Samsung Internet (25)

<sup>^</sup>Direct source is defined as the use of the exact URL to the website instead of being rerouted via the department website or from GitHub.
