# Supplementary material for: Rapidly scalable and low-cost public health surveillance reporting system for COVID-19
Source: HighWire-hosted journal article supplement (doi:10.1136/bmjhci-2023-100759), 2024-01-01
Supplement: bmjhci-2023-100759supp003_data_supplement.pdf [file bmjhci-2023-100759supp003_data_supplement.pdf]

Supplementary Appendix 3

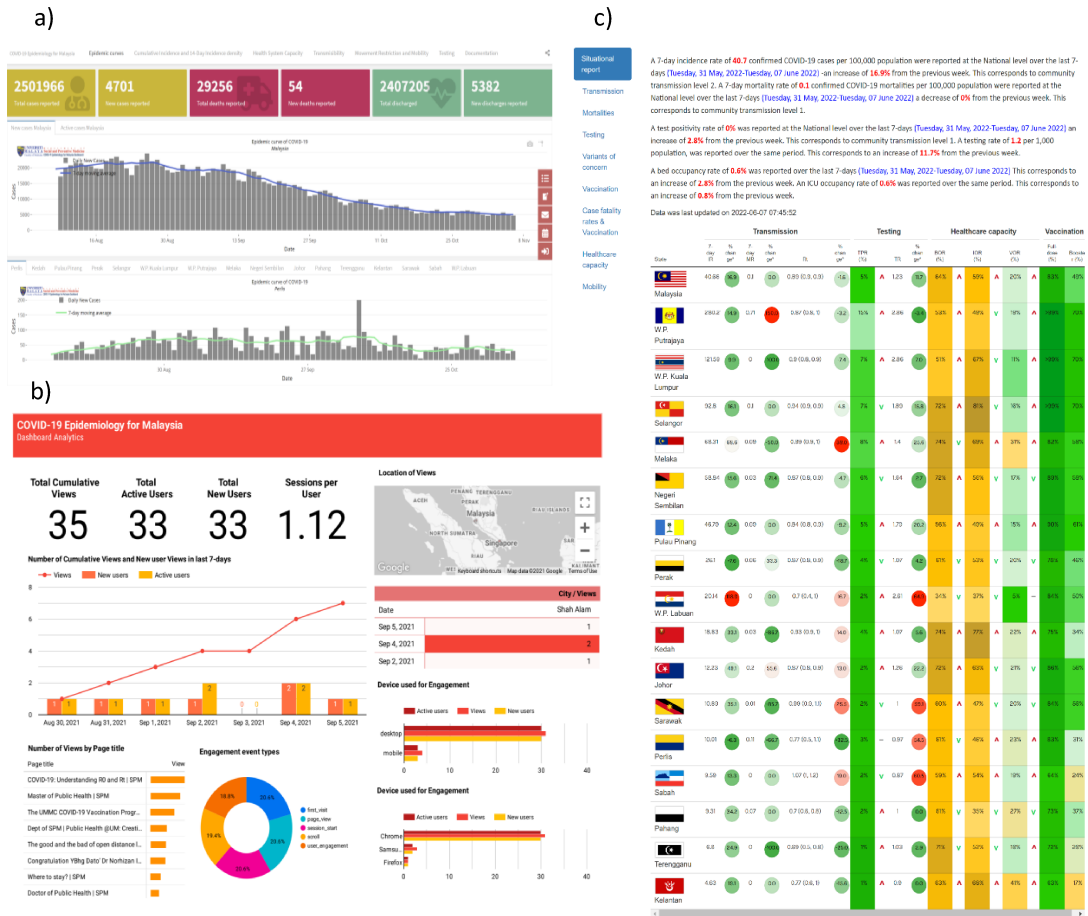

Supplementary figure 2 Dashboard and monitoring platform: a) Original dashboard with cards on daily change in cases, deaths and recoveries and national/sub-national epidemic curves, b) weekly progress report on dashboard, and c) Updated dashboard with a weekly situational report of cases in Malaysia and her states.
