# Supplementary material for: Rapidly scalable and low-cost public health surveillance reporting system for COVID-19
Source: HighWire-hosted journal article supplement (doi:10.1136/bmjhci-2023-100759), 2024-01-01
Supplement: bmjhci-2023-100759supp004_data_supplement.pdf [file bmjhci-2023-100759supp004_data_supplement.pdf]

**Supplementary Appendix 4**

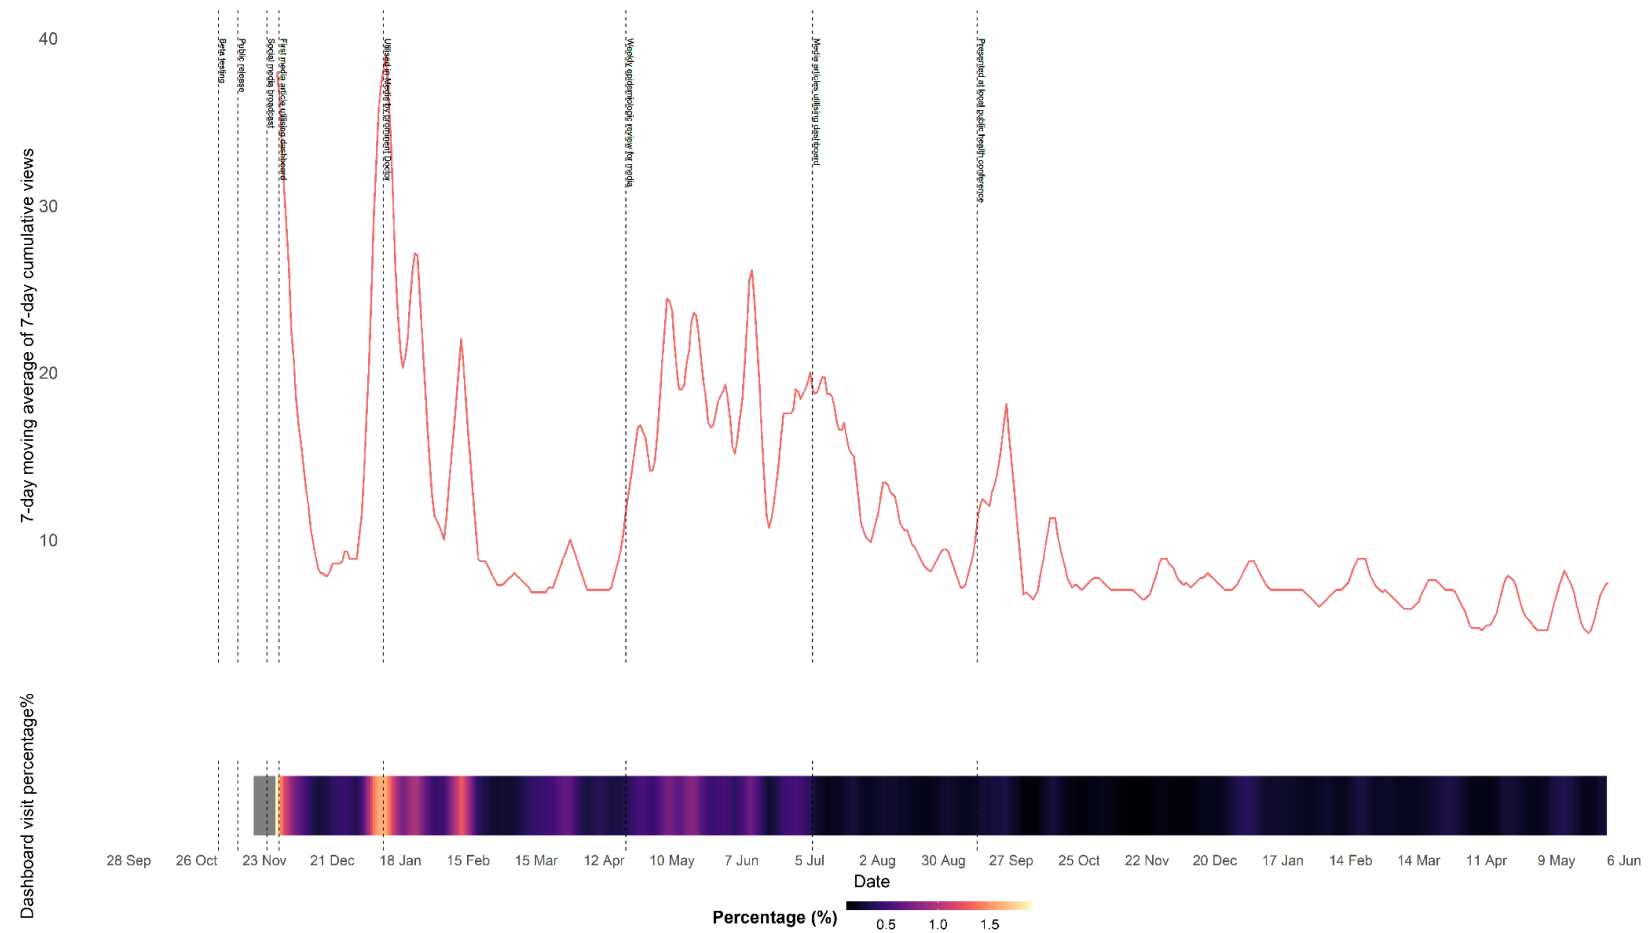

Supplementary figure 2 Number of 7-day moving average of 7-day cumulative views of dashboard between 1 October 2020-30 September 2021
